# Supplementary material for: Environmentally Friendly Extraction from Picea Abies Bark as an Approach to Accessing Valuable Antioxidants in Biorefineries
Source: MDPI journal article supplement (doi:10.3390/pr11072145), 2023-07-18
Supplement: s1 [file s1]

## Supplementary Materials

The results of the determination of saccharides are given as the average of 3 measurements with a standard deviation  $\leq 5\%$  in Table S1.

| No. | Ethanol/water<br>% (v/v) | Temperature<br>(°C) | Glu  | Xyl  | Man  | Ara  | Gal  | Sum  |
|-----|--------------------------|---------------------|------|------|------|------|------|------|
| 1   | 0                        | 40                  | 0.39 | 0.14 | 0.24 | 0.15 | 0.19 | 1.11 |
| 2   | 0                        | 60                  | 0.47 | 0.17 | 0.33 | 0.17 | 0.23 | 1.37 |
| 3   | 0                        | 80                  | 0.49 | 0.16 | 0.34 | 0.18 | 0.24 | 1.41 |
| 4   | 0                        | 100                 | 1.80 | 0.30 | 0.79 | 0.27 | 0.37 | 2.81 |
| 5   | 25                       | 40                  | 0.32 | 0.13 | 0.25 | 0.17 | 0.19 | 1.06 |
| 6   | 25                       | 60                  | 0.31 | 0.14 | 0.24 | 0.16 | 0.20 | 1.05 |
| 7   | 25                       | 80                  | 0.38 | 0.19 | 0.29 | 0.19 | 0.23 | 1.28 |
| 8   | 25                       | 100                 | 0.41 | 0.21 | 0.32 | 0.21 | 0.25 | 1.40 |
| 9   | 50                       | 40                  | 0.18 | 0.11 | 0.14 | 0.12 | 0.12 | 0.67 |
| 10  | 50                       | 60                  | 0.21 | 0.13 | 0.16 | 0.13 | 0.12 | 0.75 |
| 11  | 50                       | 80                  | 0.23 | 0.14 | 0.19 | 0.11 | 0.14 | 0.81 |
| 12  | 50                       | 100                 | 0.26 | 0.14 | 0.20 | 0.15 | 0.16 | 0.91 |
| 13  | 75                       | 40                  | 0.14 | 0.10 | 0.13 | 0.07 | 0.11 | 0.55 |
| 14  | 75                       | 60                  | 0.16 | 0.11 | 0.15 | 0.11 | 0.14 | 0.67 |
| 15  | 75                       | 80                  | 0.17 | 0.10 | 0.16 | 0.12 | 0.13 | 0.68 |
| 16  | 75                       | 100                 | 0.19 | 0.11 | 0.17 | 0.13 | 0.14 | 0.74 |

**Table S1.** Carbohydrate monomers content in % (w/w) in the freeze-dried extracts.

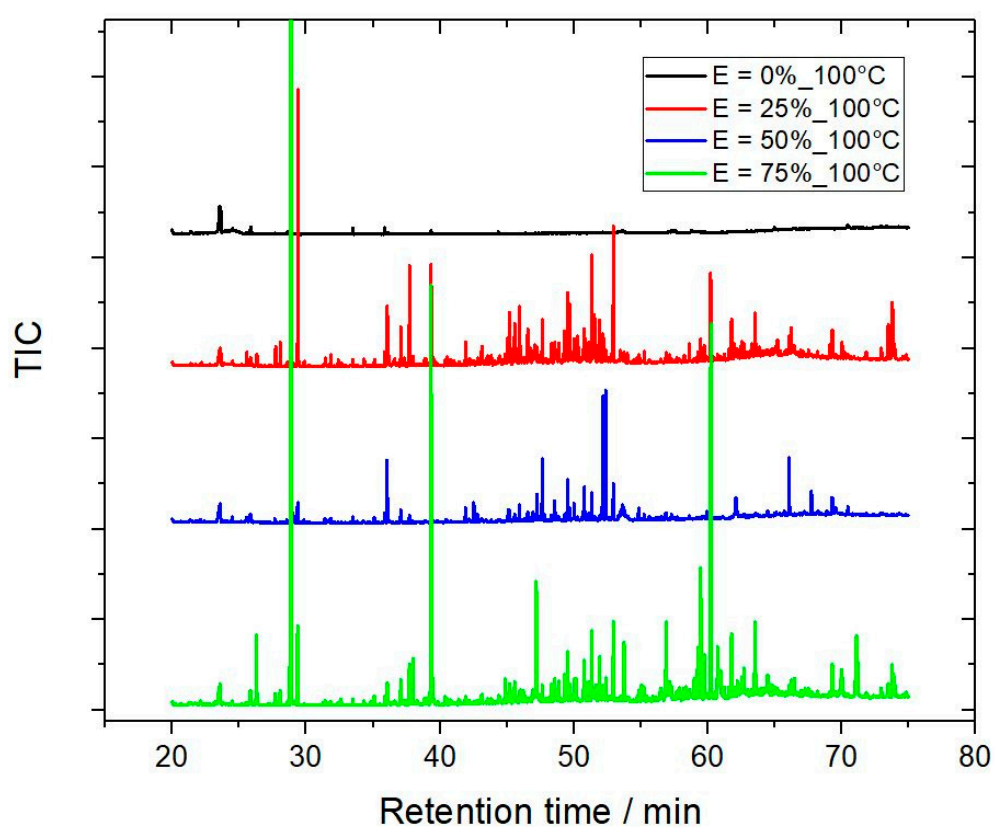

**Figure S1:** Chromatograms of all bark extracts
